# Supplementary material for: Genome-wide mapping of binding sites of the transposase-derived SETMAR protein in the human genome
Source: PubMed Central journal article supplement (PMC8327481; doi:10.1016/j.csbj.2021.07.010), 2021-07-14
Supplement: mmc1.pdf [file mmc1.pdf]

# Supplementary Figures

## Genome-wide mapping of binding sites of the transposase-derived SETMAR protein in the human genome

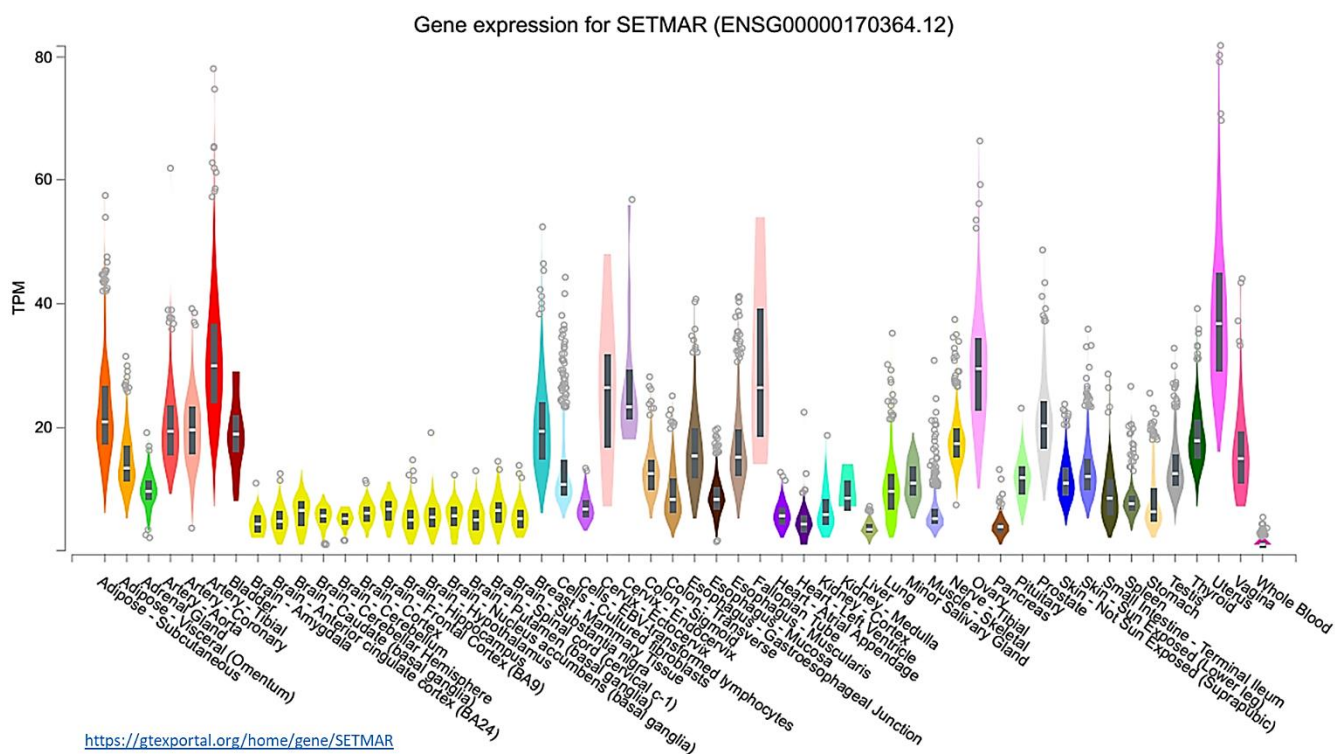

**Figure S1. Overview of SETMAR mRNA expression levels in different human tissues.** Data are from the GTEx portal. TPM: Transcripts per Million. Boxplots are shown as median and 25th and 75th percentiles. Points are displayed as outliers if they are above or below 1.5x the interquartile range. <https://gtexportal.org/home/gene/SETMAR>

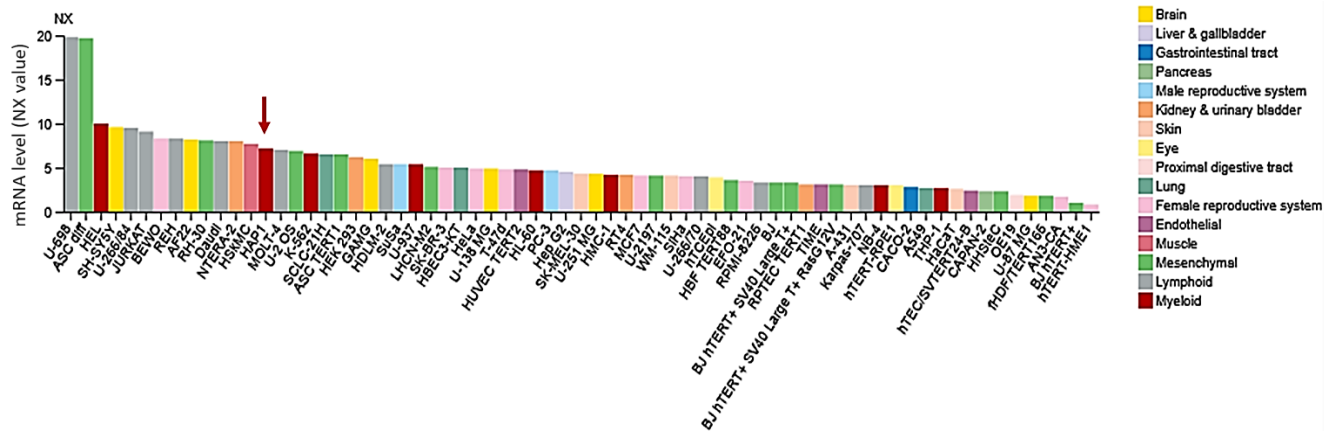

**Figure S2. Overview of SETMAR mRNA expression levels in different cell lines analyzed in the Human Protein Atlas.** RNA-seq results are reported as normalized NX values. The cell lines are divided into color-coded groups according to their origin in the human body. Vertical red arrow points to the nearly-haploid lymphoblastic leukemia cell line HAP1 used in the current study. <https://www.proteinatlas.org/ENSG00000170364-SETMAR/cell>

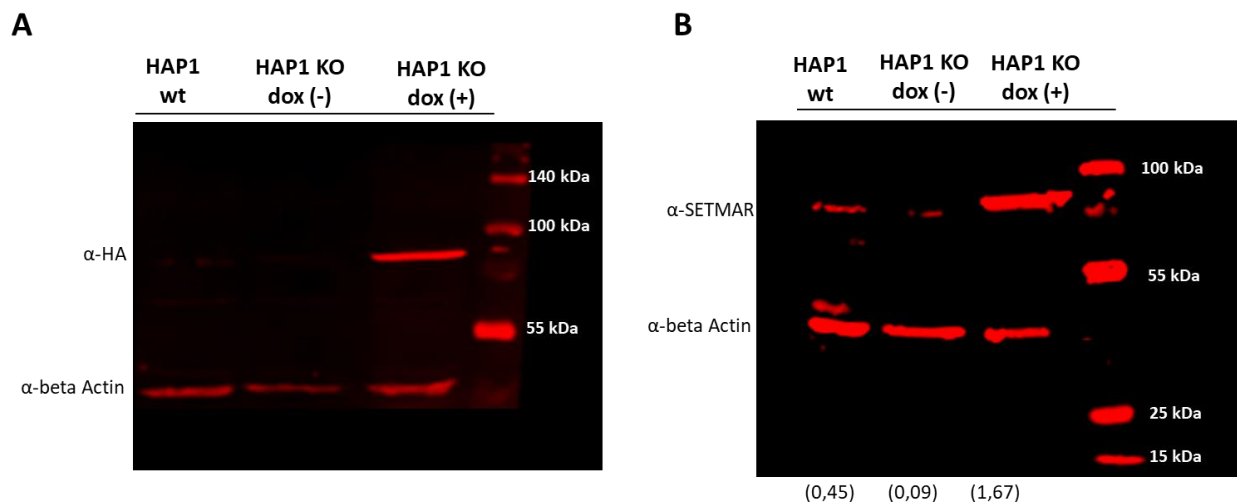

**Figure S3. Western blot analysis of SETMAR-HA expression levels (A) and endogenous SETMAR levels (B).** Hemagglutinin (HA) and SETMAR signals were detected by anti-HA and anti-SETMAR antibodies, respectively. Dox induction (dox+) was performed at a concentration of 0.5  $\mu\text{g} / \text{ml}$  of doxycycline for 24 hours. Loading control: beta Actin. Anti-SETMAR band intensities normalized to loading control ( $\alpha\text{-SETMAR} / \alpha\text{-beta Actin}$ ) are shown below panel B.

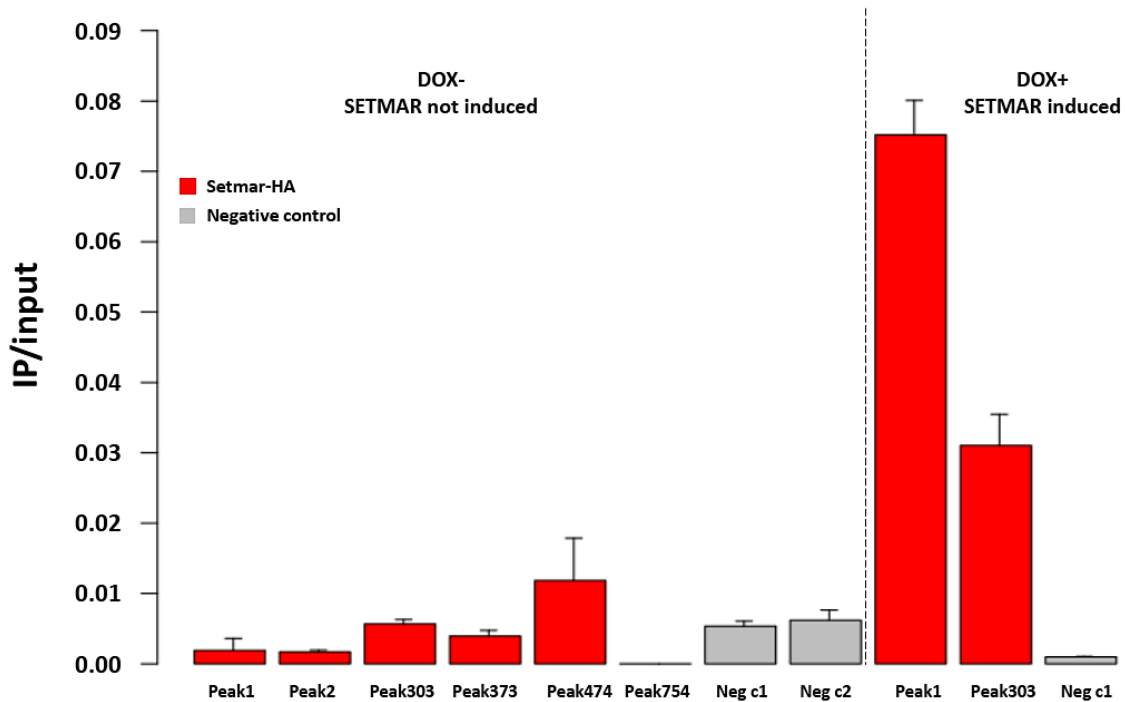

**Figure S4. ChIP-qPCR analysis of representative SETMAR-HA binding sites identified by ChIP-seq.** In the absence of dox treatment (dox-), SETMAR-HA is not expressed and only background qPCR signal is detected at specific peak positions (red bars). In contrast, high ChIP enrichment is detected in the dox-induced sample (dox+) expressing the SETMAR-HA fusion protein. Grey bars represent negative control sites characterized by a background ChIP-seq signal. Error bars represent the coefficient of variation. Chromosomal position of the test loci is shown in Supplementary Table S1.
